# Supplementary material for: A dual-response mitochondria-targeted NIR fluorescent probe with large Stokes shift for monitoring viscosity and HOCl in living cells and zebrafish
Source: Royal Society of Chemistry journal article supplement (doi:10.1039/d2an01693a), 2022-11-17
Supplement: d2an01693a1.pdf [file d2an01693a1.pdf]

## Supporting Information

### **Dual-response mitochondria-targeted NIR fluorescent probe with large Stokes shift for monitoring viscosity and HOCl in living cells and zebrafish**

Wangbo Qu, Bin Yang, Taiyu Guo, Ruowei Tian, Shuang Qiu, Xinyue Chen, Zhirong Geng\*, Zhilin Wang\*.

State Key Laboratory of Coordination Chemistry, School of Chemistry and Chemical Engineering, Collaborative Innovation Center of Advanced Microstructures, Nanjing University, Nanjing 210023, P. R. China.

\*Corresponding author.

E-mail: gengzr@nju.edu.cn (Z. R. Geng); wangzl@nju.edu.cn (Z. L. Wang).

## Table of contents

|                                                                                                                                                                                                                                                |    |
|------------------------------------------------------------------------------------------------------------------------------------------------------------------------------------------------------------------------------------------------|----|
| <b>Instruments</b> .....                                                                                                                                                                                                                       | 4  |
| <b>Preparation for the experiment</b> .....                                                                                                                                                                                                    | 4  |
| <b>Synthesis of compound HBTOH</b> .....                                                                                                                                                                                                       | 5  |
| <b>Synthesis of compound HBTOF</b> .....                                                                                                                                                                                                       | 5  |
| <b>Synthesis of compound HBTDF</b> .....                                                                                                                                                                                                       | 6  |
| <b>Figure S1.</b> <sup>1</sup> H NMR (400 MHz) spectra of HBTOH in DMSO- <i>d</i> <sub>6</sub> .....                                                                                                                                           | 7  |
| <b>Figure S2.</b> <sup>13</sup> C NMR (100 MHz) spectra of HBTOH in DMSO- <i>d</i> <sub>6</sub> .....                                                                                                                                          | 7  |
| <b>Figure S3.</b> <sup>1</sup> H NMR (400 MHz) spectra of HBTOF in DMSO- <i>d</i> <sub>6</sub> .....                                                                                                                                           | 8  |
| <b>Figure S4.</b> <sup>13</sup> C NMR (100 MHz) spectra of HBTOF in DMSO- <i>d</i> <sub>6</sub> .....                                                                                                                                          | 8  |
| <b>Figure S5.</b> <sup>1</sup> H NMR (400 MHz) spectra of HBTDF in DMSO- <i>d</i> <sub>6</sub> .....                                                                                                                                           | 9  |
| <b>Figure S6.</b> <sup>13</sup> C NMR (100 MHz) spectra of HBTDF in DMSO- <i>d</i> <sub>6</sub> .....                                                                                                                                          | 9  |
| <b>Figure S7.</b> <sup>1</sup> H NMR (400 MHz) spectra of probe HBTN in DMSO- <i>d</i> <sub>6</sub> .....                                                                                                                                      | 10 |
| <b>Figure S8.</b> <sup>13</sup> C NMR (100 MHz) spectra of probe HBTN in DMSO- <i>d</i> <sub>6</sub> .....                                                                                                                                     | 10 |
| <b>Figure S9.</b> HRMS spectra of HBTOH .....                                                                                                                                                                                                  | 11 |
| <b>Figure S10.</b> HRMS spectra of HBTOF.....                                                                                                                                                                                                  | 11 |
| <b>Figure S11.</b> HRMS spectra of HBTDF.....                                                                                                                                                                                                  | 12 |
| <b>Figure S12.</b> HRMS spectra of probe HBTN .....                                                                                                                                                                                            | 12 |
| <b>Figure S13.</b> Fluorescence spectra of HBTN and HBTN + HOCl with excitation wavelengths of 402 nm and 502 nm, respectively. ....                                                                                                           | 13 |
| <b>Figure S14.</b> Excitation spectra of HBTN and HBTN + HOCl.....                                                                                                                                                                             | 13 |
| <b>Figure S15.</b> Photograph of the probe HBTN (10 μM) under 365 nm UV light in different viscosity system (water-glycerol mixed solvents: from left to right, $f_{\text{glycerol}} = 0, 20, 40, 50, 60, 70, 75, 80, 85, 90, 95, 100$ ). .... | 14 |
| <b>Figure S16.</b> Absorbance ( $A_{402}$ ) of HBTN (10 μM) upon different amounts of HOCl (0-18 μM). .                                                                                                                                        | 14 |
| <b>Figure S17.</b> Linear relationship of absorption intensity at 402 nm and HOCl concentration (0-5 μM). ....                                                                                                                                 | 14 |
| <b>Figure S18.</b> Fluorescence spectra of HBTN (10 μM) in the presence of HOCl (20 μM) or amino acid (500 μM). ....                                                                                                                           | 15 |
| <b>Figure S19.</b> Ratio of fluorescence intensities ( $I_{530}/I_{680}$ ) of HBTN (10 μM) in the presence of HOCl (20 μM) or amino acid (500 μM).....                                                                                         | 15 |
| <b>Figure S20.</b> Fluorescence spectra of HBTN (10 μM) in the presence of HOCl (20 μM), metal ion (200 μM) or acid anion (200 μM). ....                                                                                                       | 16 |
| <b>Figure S21.</b> Ratio of fluorescence intensities ( $I_{530}/I_{680}$ ) of HBTN (10 μM) in the presence of HOCl (20 μM), metal ion (200 μM) or acid anion (200 μM).....                                                                     | 16 |
| <b>Figure S22.</b> Photograph under visible light of HBTN (10 μM) in the presence of HOCl (20 μM) or other ROS (200 μM). ....                                                                                                                  | 16 |
| <b>Figure S23.</b> LUMO+1 of HBTN.....                                                                                                                                                                                                         | 17 |
| <b>Figure S24.</b> HRMS spectra of HBTN in the presence of HOCl. ....                                                                                                                                                                          | 17 |
| <b>Figure S25.</b> Cell viability of MCF-7 cells treated with different concentrations of HBTN (0, 5, 10, 15, 20, 25 and 30 μM) for 12 h, The cell viability was observed via MTT assay. ....                                                  | 18 |
| <b>Figure S26.</b> Brightfield images of MCF-7 cells irradiated with 405 nm laser light for different durations.....                                                                                                                           | 18 |
| <b>Table S1.</b> The photophysical properties of HBTN, HBTN + glycerol and HBTN + HOCl.....                                                                                                                                                    | 18 |

**Table S2.** Comparison of fluorescent probe for viscosity and HOCl.....19

## Instruments

Ultrapure water was prepared by Milli Q Advantage A10 ultrapure water system and was used to prepare all solutions. The ultraviolet-visible absorption spectrum and fluorescence spectrum were measured by Shimadzu UV 3600 ultraviolet-visible spectrometer and PerkinElmer LS 55 fluorescence spectrometer, respectively. Fluorescence quantum yield and fluorescence lifetime were tested by Edinburgh FLS980 steady-state transient fluorescence spectrometer. All NMR spectra were measured by Bruker AVANCE III 400 MHz with tetramethylsilane (TMS) as the internal standard. All mass spectra were obtained by Thermo Fisher Q Exactive high resolution mass spectrometer. All cell viability was measured by MTT method using Thermo Scientific Varioskan R Flash full-wavelength scanning multi-function reader. Biological imaging experiments were performed by Zeiss LSM 710 laser confocal fluorescence microscope.

## Preparation for the experiment

The stock solution of HBTN (10 mM) was prepared using DMF. All analytical substances (HOCl, Cys, Hcy, GSH, Asp, Glu, Gly, His, Leu, Lys, Pro, Ser, Thr, Trp, Tyr, Val,  $\text{Cu}^{2+}$ ,  $\text{Zn}^{2+}$ ,  $\text{Mg}^{2+}$ ,  $\text{Ca}^{2+}$ ,  $\text{Fe}^{3+}$ ,  $\text{Cu}^{2+}$ ,  $\text{Zn}^{2+}$ ,  $\text{Mg}^{2+}$ ,  $\text{Ca}^{2+}$ ,  $\text{Fe}^{3+}$ ,  $\text{Ac}^-$ ,  $\text{SO}_3^{2-}$ ,  $\text{SO}_4^{2-}$ ,  $\text{S}_2\text{O}_3^{2-}$ ,  $\text{S}^{2-}$ ,  $\text{CO}_3^-$ , Br, I, Cl,  $\text{ONOO}^-$ ,  $\text{H}_2\text{O}_2$ ,  $\cdot\text{OH}$ ,  $^1\text{O}_2$ ,  $\text{O}_2^-$ ,  $\text{NO}_2^-$ ,  $\text{NO}_3^-$ ) were prepared in ultrapure water. Probe HBTN was used at a working concentration of 10  $\mu\text{M}$  (0.1% DMF) for spectroscopic testing and bioimaging.

### Synthesis of compound HBTOH

2-Hydroxy-5-methylbenzaldehyde (2.72 g, 20.0 mmol), 2-aminobenzenethiol (2.14 g, 20.0 mmol), sodium metabisulfite (3.80 g, 20.0 mmol) and 30 mL DMF were added to 100 mL single-necked flask, then refluxed for 1.5 h. After the reaction was completed, the reaction solution was cooled to room temperature. It was then added to 100 mL of secondary water, resulting in an obvious solid, and the crude product was obtained by suction filtration. Purification using column chromatography (eluent: petroleum ether/ethyl acetate = 1:1) gave compound HBT-OH (3.88 g, 80%) as a white solid. <sup>1</sup>H NMR (400 MHz, DMSO-*d*<sub>6</sub>) δ 11.37 (s, 1H), 8.12 (d, *J* = 7.9 Hz, 1H), 8.05 (d, *J* = 8.1 Hz, 1H), 7.96 (d, *J* = 1.2 Hz, 1H), 7.53 (ddd, *J* = 8.3, 7.2, 1.3 Hz, 1H), 7.43 (ddd, *J* = 8.2, 7.2, 1.2 Hz, 1H), 7.22 (dd, *J* = 8.4, 2.2 Hz, 1H), 6.98 (d, *J* = 8.3 Hz, 1H), 2.31 (s, 3H). <sup>13</sup>C NMR (100 MHz, DMSO-*d*<sub>6</sub>) δ 165.34, 154.19, 151.45, 134.22, 133.22, 128.39, 128.26, 126.42, 125.01, 122.03, 121.96, 117.89, 116.87, 20.02. HRMS (ESI): calcd for C<sub>14</sub>H<sub>10</sub>NOS<sup>-</sup> [M - H]<sup>-</sup> m/z, 240.0478; found, 240.0485.

### Synthesis of compound HBTOF

A mixture of HBT-OH (3.52 g, 14.6 mmol), HMTA (5.12 g, 36.5 mmol) and trifluoroacetic acid (20 mL) was added to a 100 mL single-neck flask, and the mixture was refluxed at 80 °C for 24 h. After cooling to room temperature, a pale-yellow solid precipitated out as the pH was adjusted to neutrality with NaOH solution. The crude product was obtained by suction filtration. We purified it by column chromatography (eluent: dichloromethane) to obtain compound HBTOF (3.29 g, 84%) as a pale-yellow

solid.  $^1\text{H}$  NMR (400 MHz,  $\text{DMSO-}d_6$ )  $\delta$  12.74 (s, 1H), 10.33 (s, 1H), 8.24 - 8.17 (m, 2H), 8.12 (dt,  $J = 8.1, 1.0$  Hz, 1H), 7.73 (dd,  $J = 2.3, 0.9$  Hz, 1H), 7.60 (ddd,  $J = 8.2, 7.2, 1.3$  Hz, 1H), 7.51 (ddd,  $J = 8.3, 7.2, 1.2$  Hz, 1H), 2.39 (s, 3H).  $^{13}\text{C}$  NMR (100 MHz,  $\text{DMSO-}d_6$ )  $\delta$  191.82, 165.17, 157.03, 150.99, 135.28, 133.56, 133.10, 129.31, 126.95, 125.84, 123.24, 122.32, 122.28, 119.12, 19.75. HRMS (ESI): calcd for  $\text{C}_{15}\text{H}_{10}\text{NO}_2\text{S}^-$   $[\text{M} - \text{H}]^-$   $m/z$ , 268.0427; found, 268.0439.

### Synthesis of compound HBTDF

The HBTOF (1.00 g, 3.72 mmol) was dissolved in toluene (30 mL) and then (triphenylphosphoranylidene)acetaldehyde (1.25 g, 4.10 mmol) was added. After the mixture was reacted at 60 °C for 7 h, the solvent was removed. The solid was purified using column chromatography (eluent: dichloromethane) to give compound HBTDF (1.06 g, 96%) as a yellow solid.  $^1\text{H}$  NMR (400 MHz,  $\text{DMSO-}d_6$ )  $\delta$  13.09 (s, 1H), 9.72 (d,  $J = 7.8$  Hz, 1H), 8.22 (d,  $J = 8.1$  Hz, 1H), 8.13 (d,  $J = 8.4$  Hz, 1H), 7.98 (d,  $J = 16.1$  Hz, 1H), 7.80 (dd,  $J = 13.4, 1.6$  Hz, 2H), 7.61 (ddd,  $J = 8.3, 7.2, 1.3$  Hz, 1H), 7.53 (ddd,  $J = 8.3, 7.2, 1.2$  Hz, 1H), 6.97 (dd,  $J = 16.0, 7.8$  Hz, 1H), 2.37 (s, 3H).  $^{13}\text{C}$  NMR (100 MHz,  $\text{DMSO-}d_6$ )  $\delta$  194.84, 168.27, 154.01, 150.82, 146.97, 132.78, 132.45, 131.65, 129.40, 129.19, 127.18, 126.12, 122.53, 122.43, 122.05, 117.11, 19.82. HRMS (ESI): calcd for  $\text{C}_{17}\text{H}_{12}\text{NO}_2\text{S}^-$   $[\text{M} - \text{H}]^-$   $m/z$ , 294.0583; found, 294.0595.

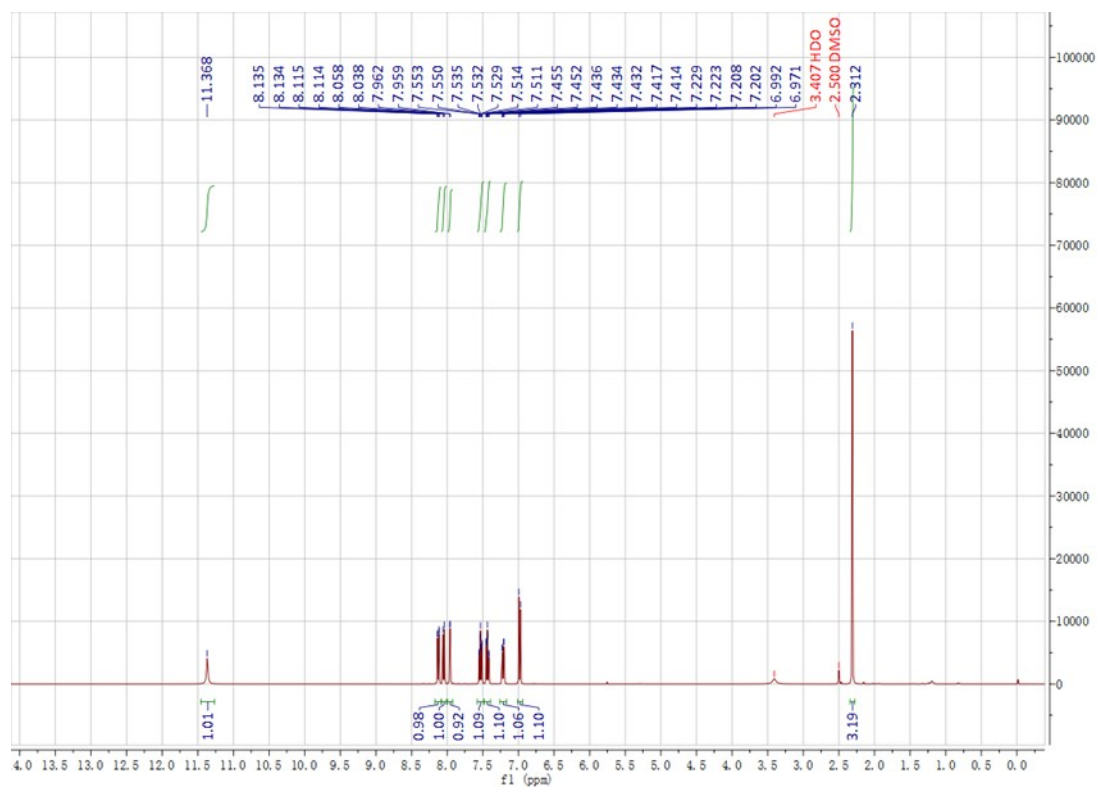

Figure S1.  $^1\text{H}$  NMR (400 MHz) spectra of HBTOH in  $\text{DMSO-}d_6$ .

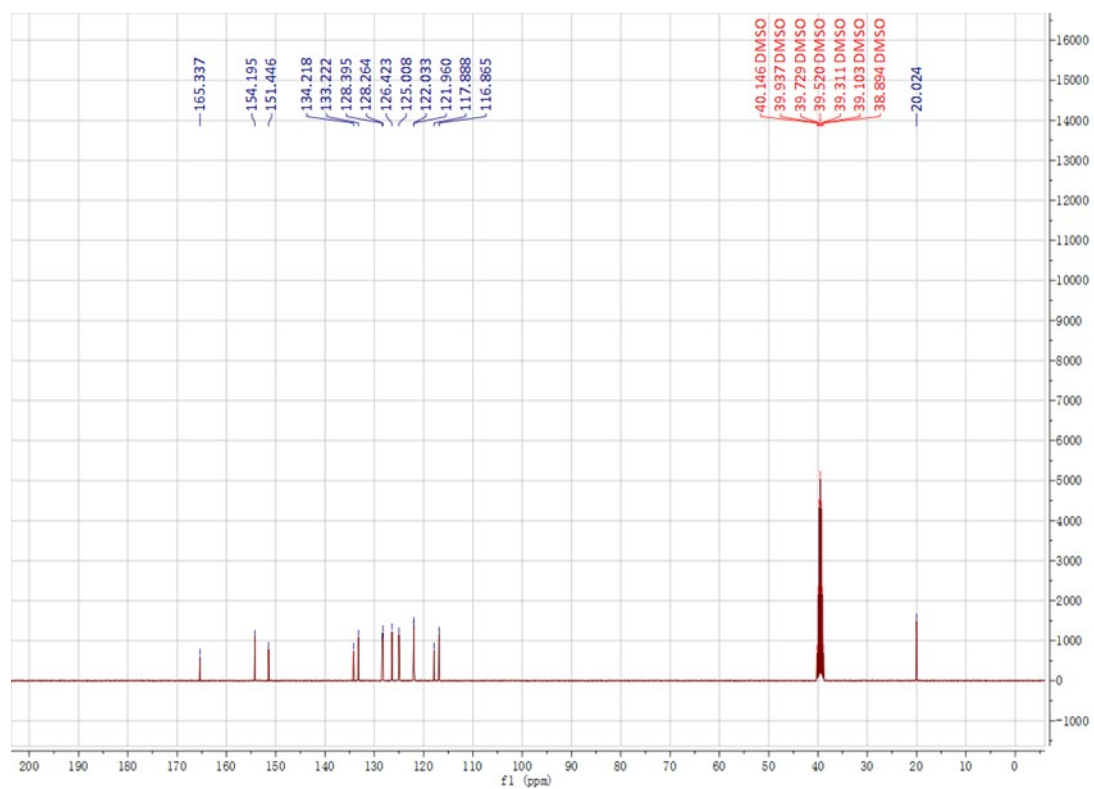

Figure S2.  $^{13}\text{C}$  NMR (100 MHz) spectra of HBTOH in  $\text{DMSO-}d_6$ .

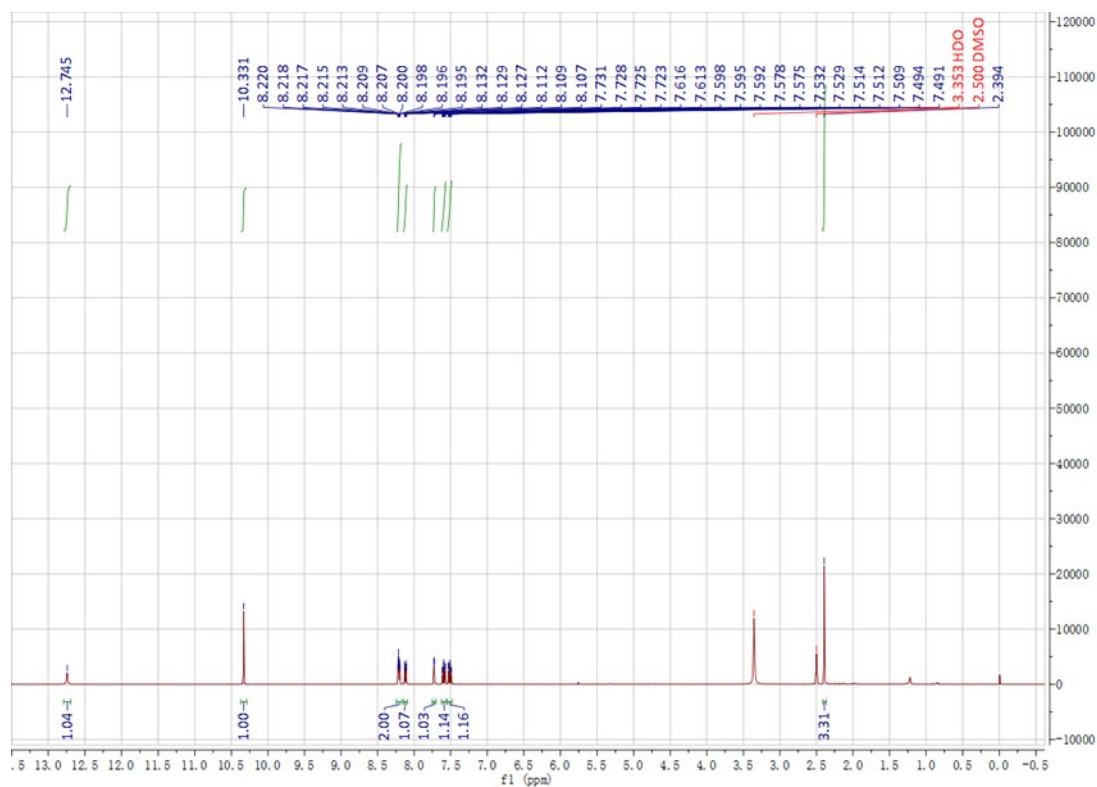

Figure S3.  $^1\text{H}$  NMR (400 MHz) spectra of HBTOF in  $\text{DMSO-}d_6$ .

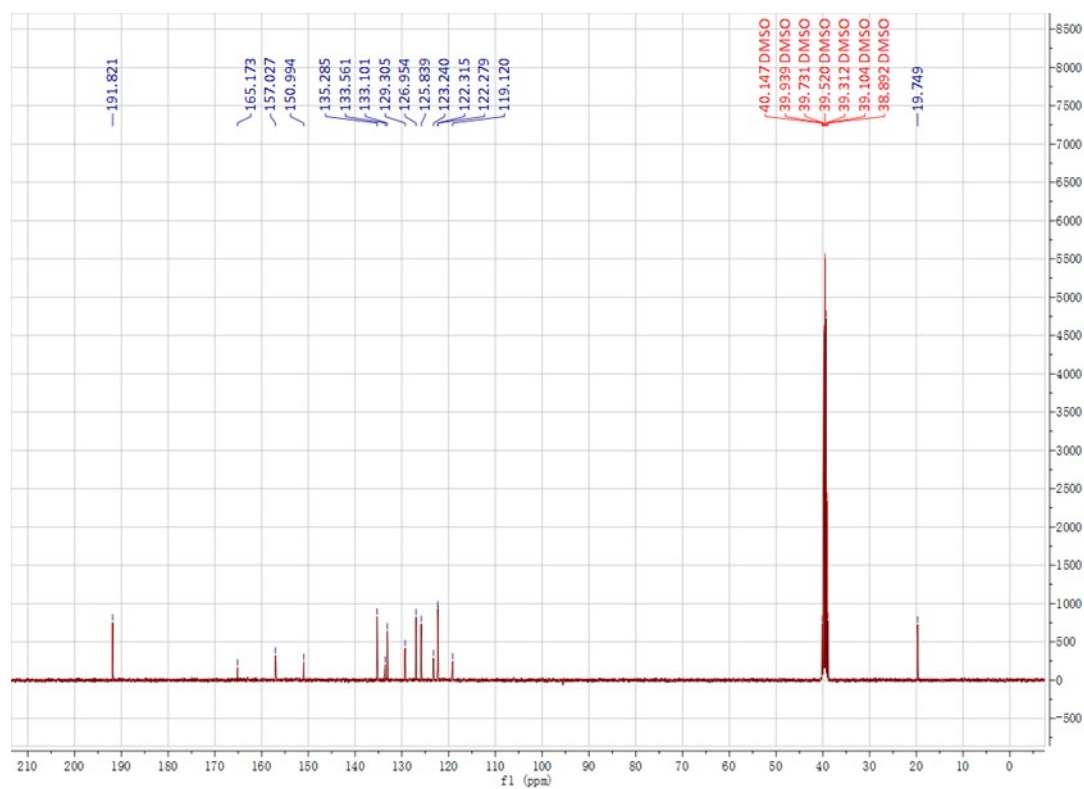

Figure S4.  $^{13}\text{C}$  NMR (100 MHz) spectra of HBTOF in  $\text{DMSO-}d_6$ .



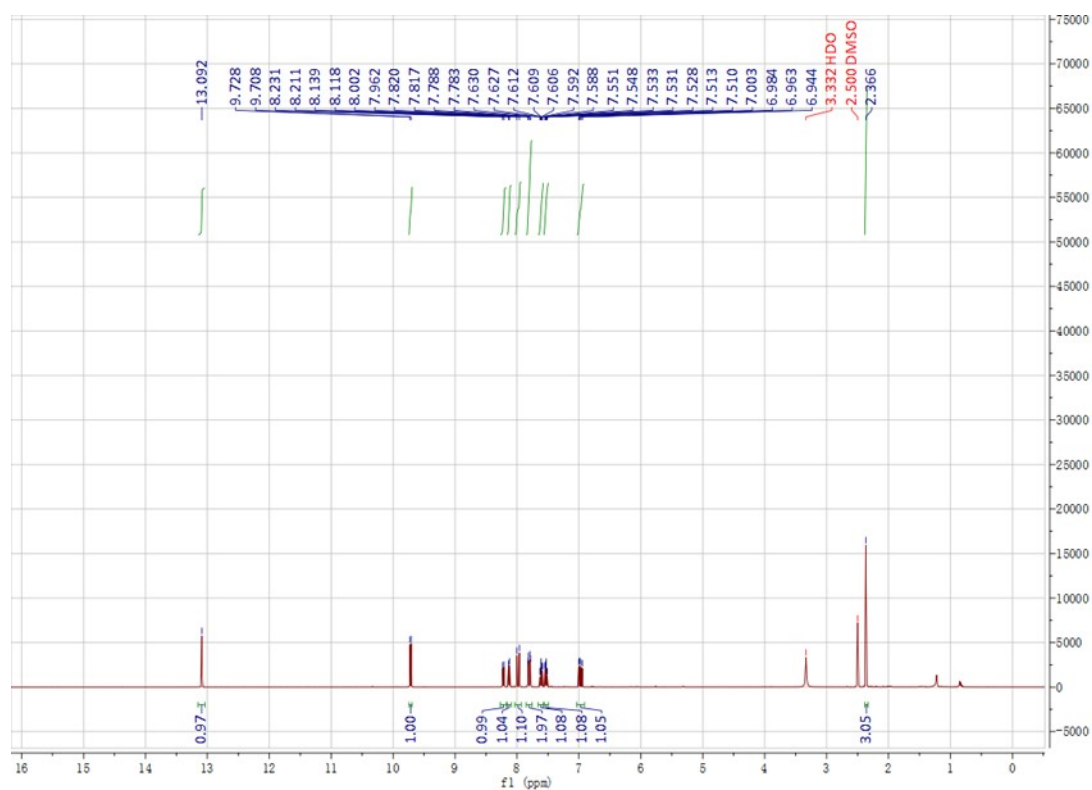

Figure S5.  $^1\text{H}$  NMR (400 MHz) spectra of HBTDF in  $\text{DMSO-}d_6$ .

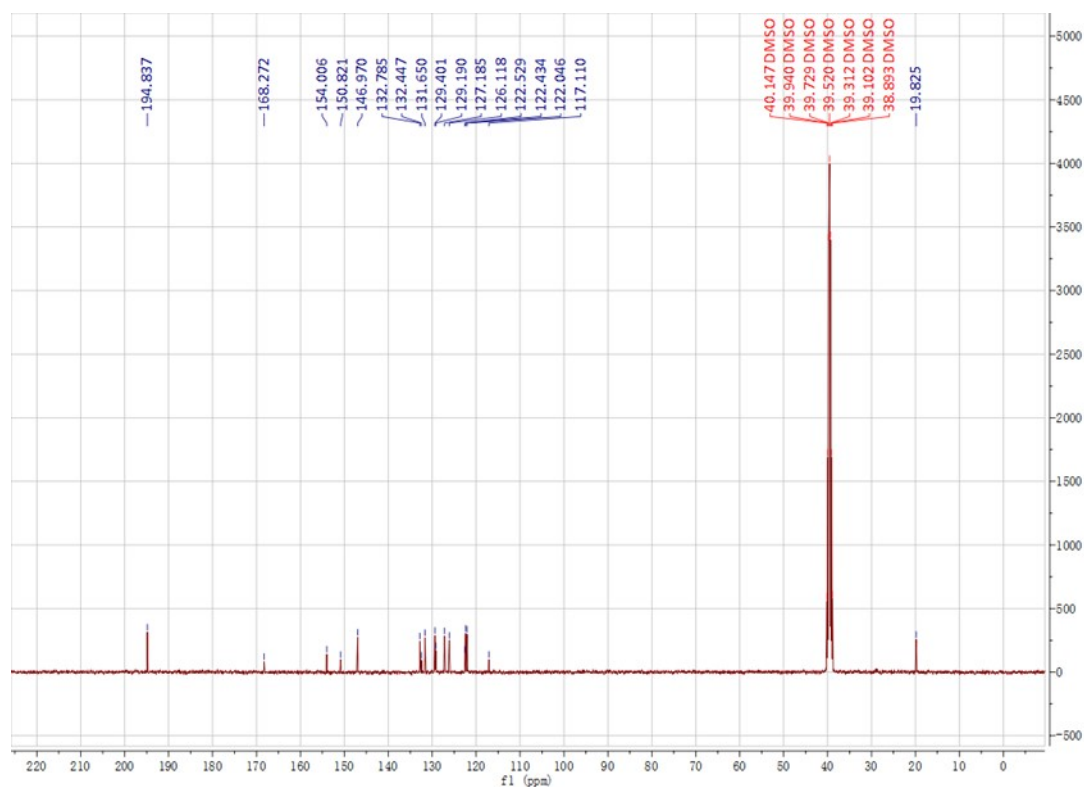

Figure S6.  $^{13}\text{C}$  NMR (100 MHz) spectra of HBTDF in  $\text{DMSO-}d_6$ .

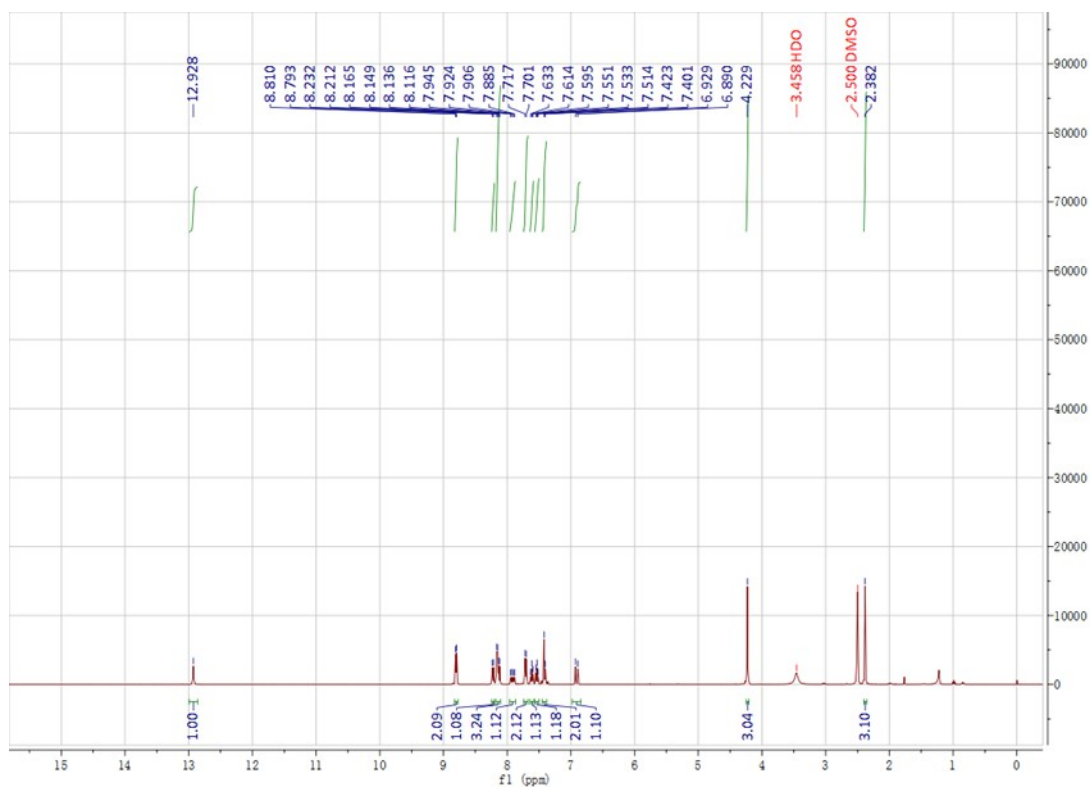

Figure S7.  $^1\text{H}$  NMR (400 MHz) spectra of probe HBTN in  $\text{DMSO-}d_6$ .

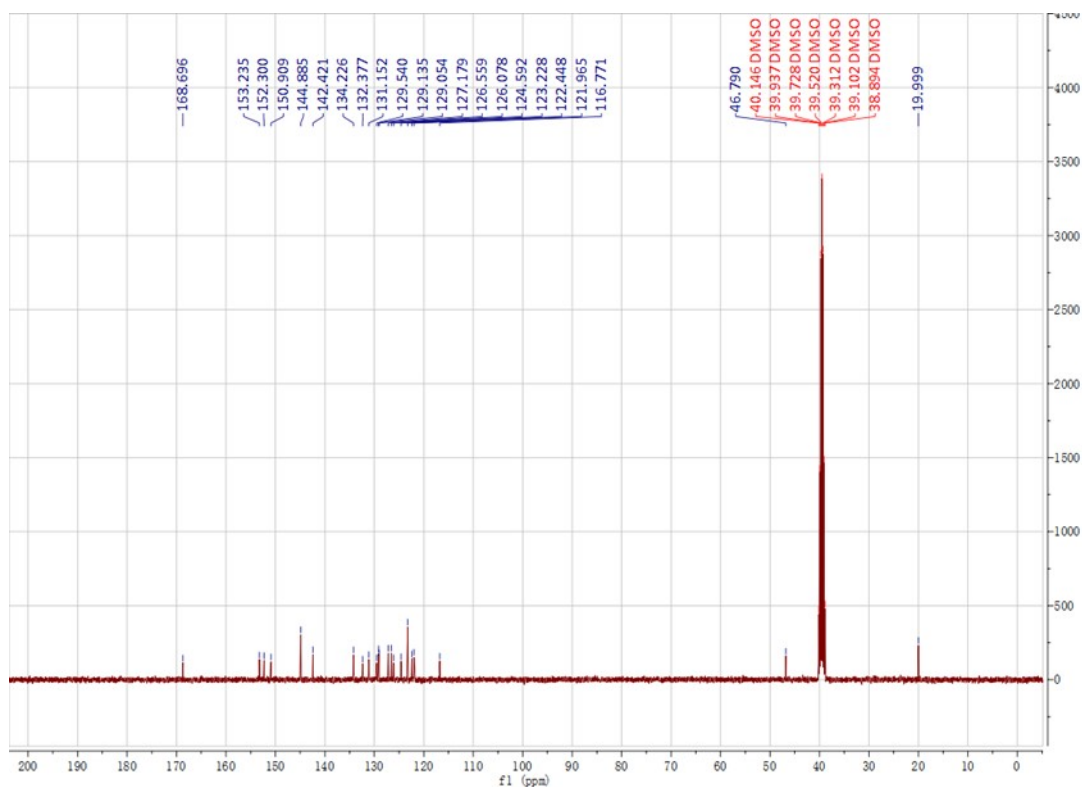

Figure S8.  $^{13}\text{C}$  NMR (100 MHz) spectra of probe HBTN in  $\text{DMSO-}d_6$ .

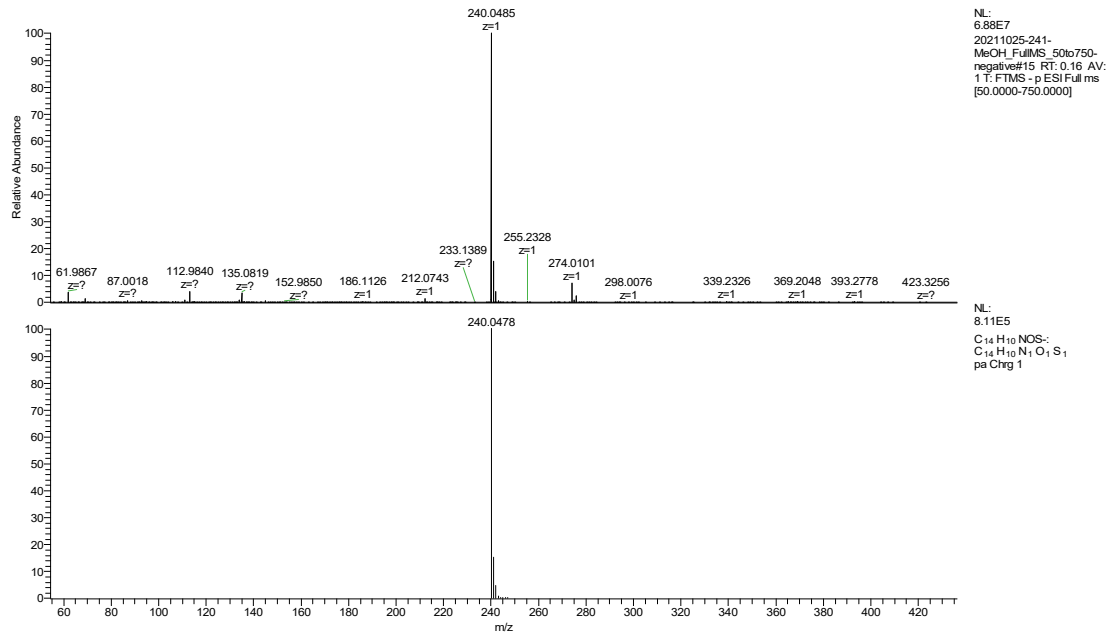

Figure S9. HRMS spectra of HBTOH.

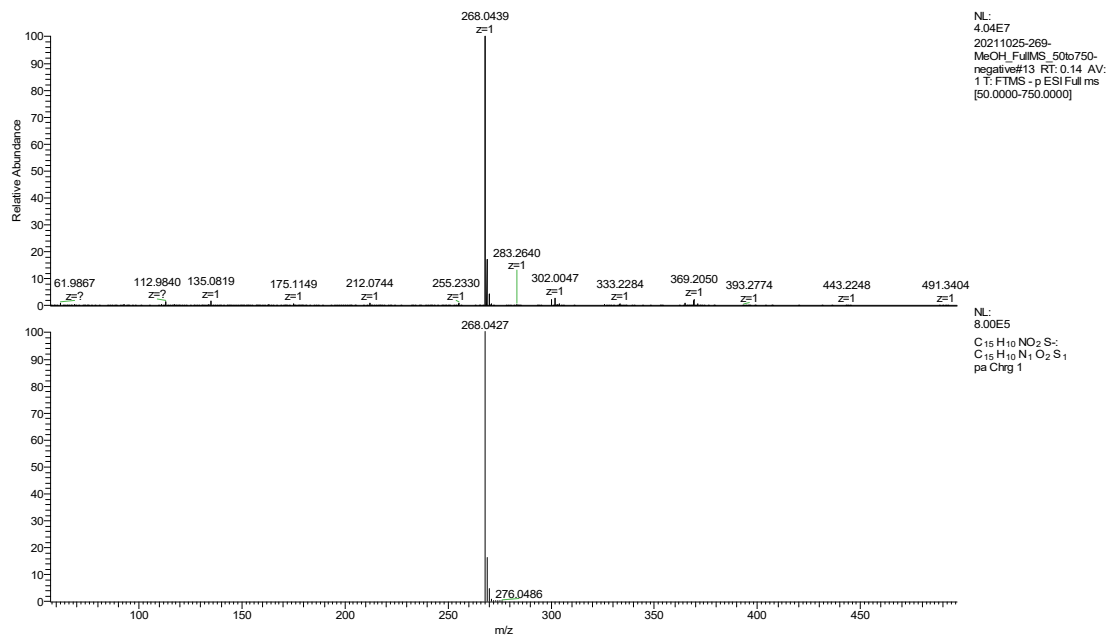

Figure S10. HRMS spectra of HBTOF.

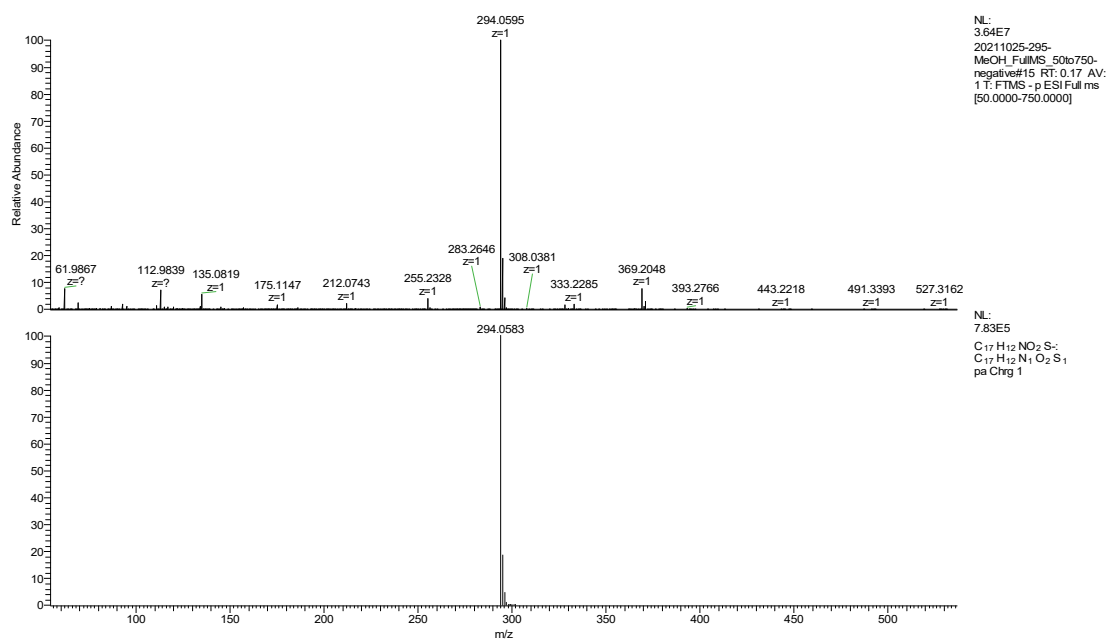

Figure S11. HRMS spectra of HBTDF.

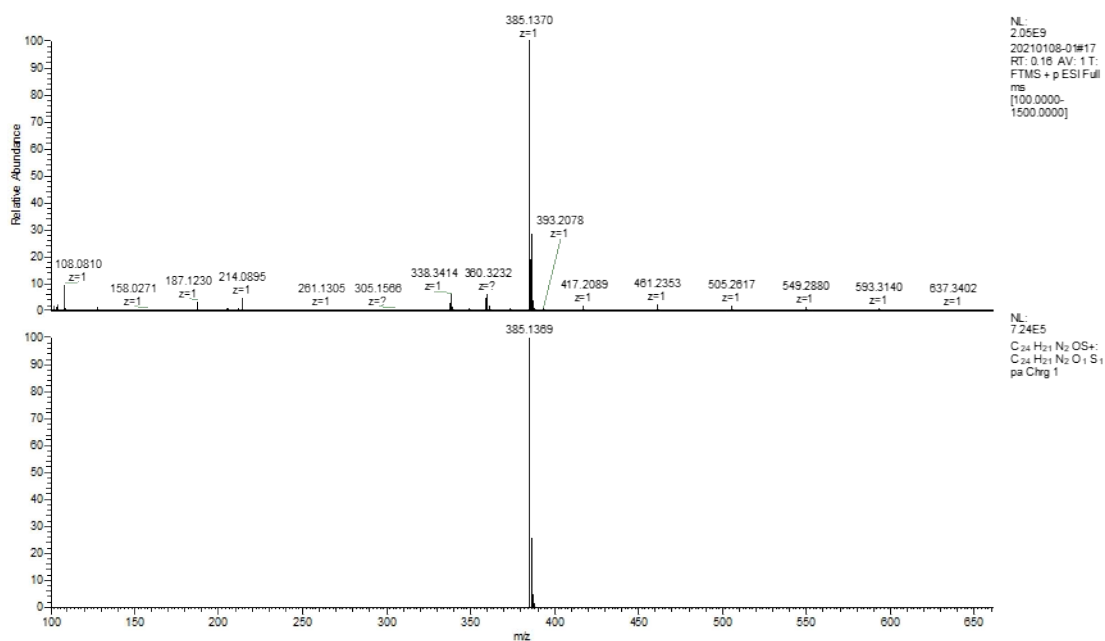

Figure S12. HRMS spectra of probe HBTN.

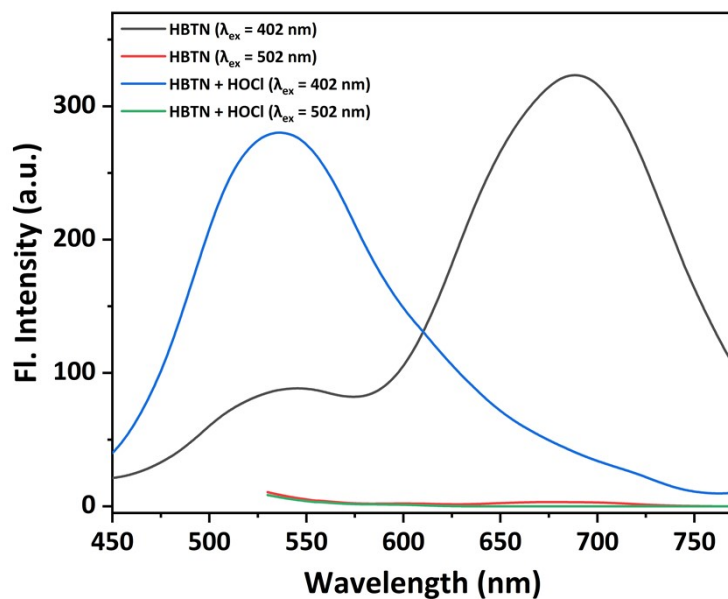

**Figure S13.** Fluorescence spectra of HBTN and HBTN + HOCl with excitation wavelengths of 402 nm and 502 nm, respectively.

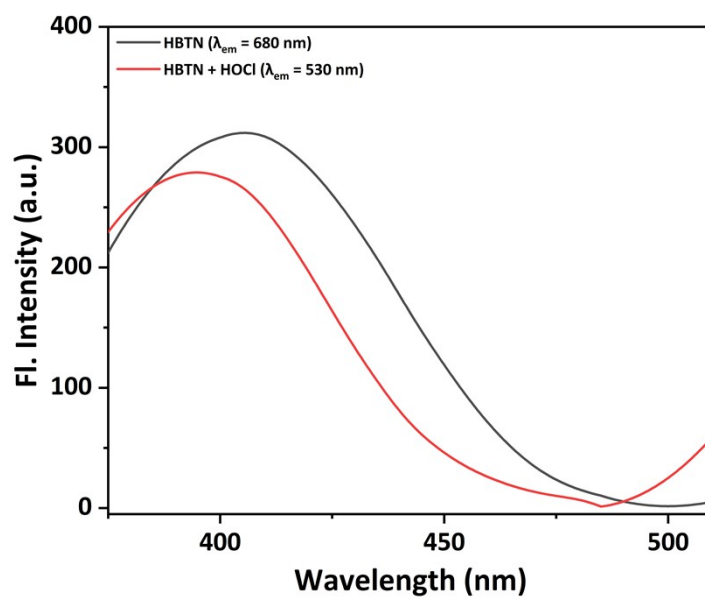

**Figure S14.** Excitation spectra of HBTN and HBTN + HOCl.

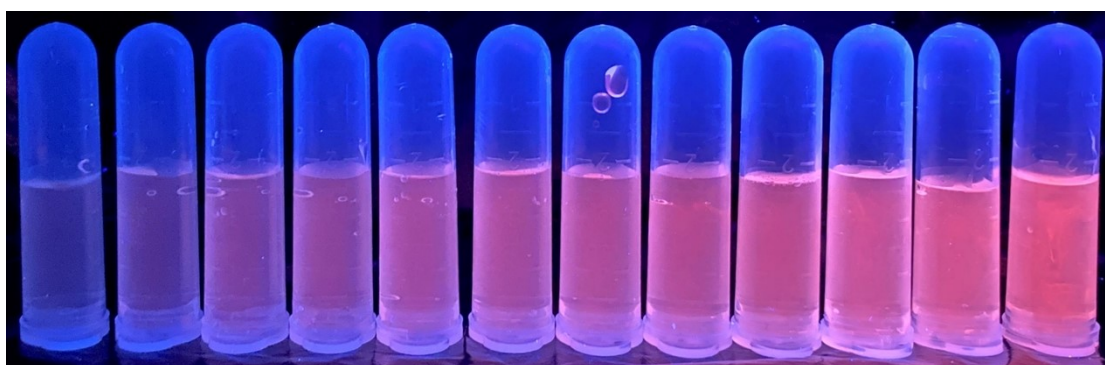

**Figure S15.** Photograph of the probe HBTN (10  $\mu\text{M}$ ) under 365 nm UV light in different viscosity system (water-glycerol mixed solvents: from left to right,  $f_{\text{glycerol}} = 0, 20, 40, 50, 60, 70, 75, 80, 85, 90, 95, 100$ ).

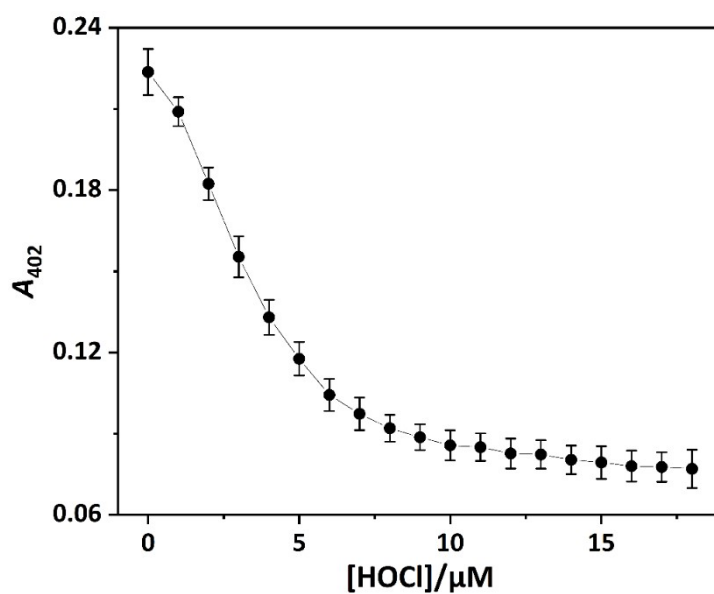

**Figure S16.** Absorbance ( $A_{402}$ ) of HBTN (10  $\mu\text{M}$ ) upon different amounts of HOCl (0-18  $\mu\text{M}$ ).

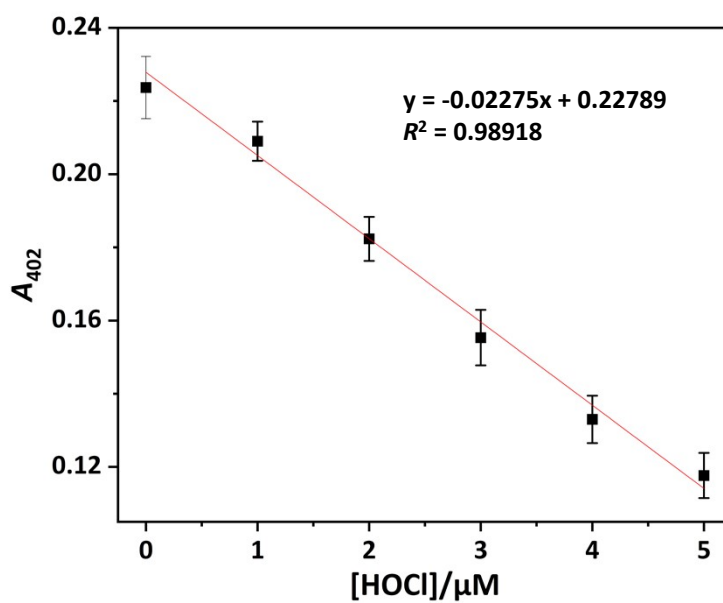

**Figure S17.** Linear relationship of absorption intensity at 402 nm and HOCl concentration (0-5  $\mu\text{M}$ ).

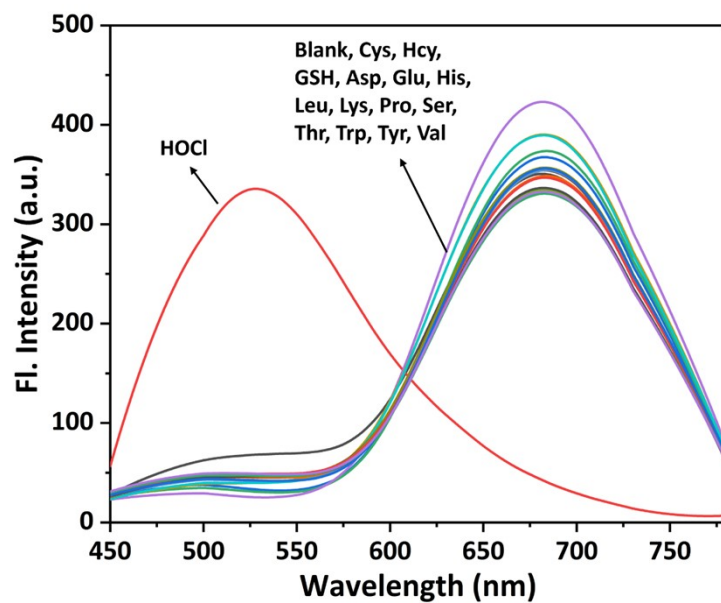

**Figure S18.** Fluorescence spectra of HBTN (10  $\mu\text{M}$ ) in the presence of HOCl (20  $\mu\text{M}$ ) or amino acid (500  $\mu\text{M}$ ).

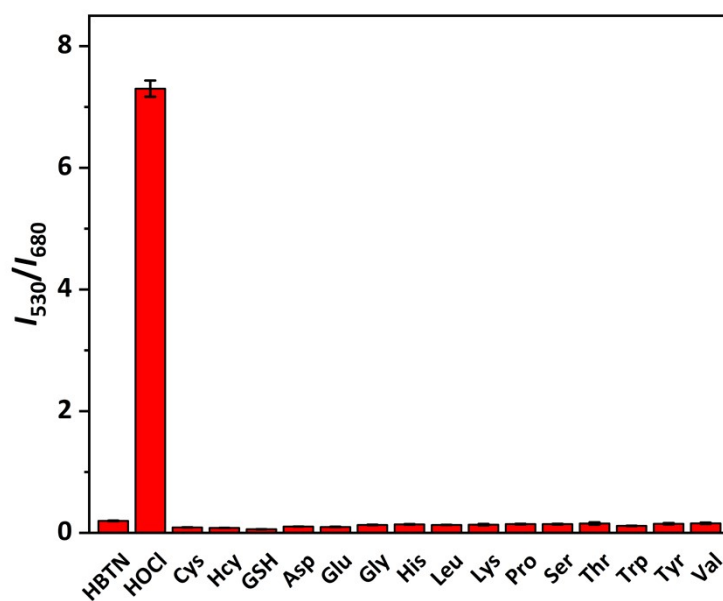

**Figure S19.** Ratio of fluorescence intensities ( $I_{530}/I_{680}$ ) of HBTN (10  $\mu\text{M}$ ) in the presence of HOCl (20  $\mu\text{M}$ ) or amino acid (500  $\mu\text{M}$ ).

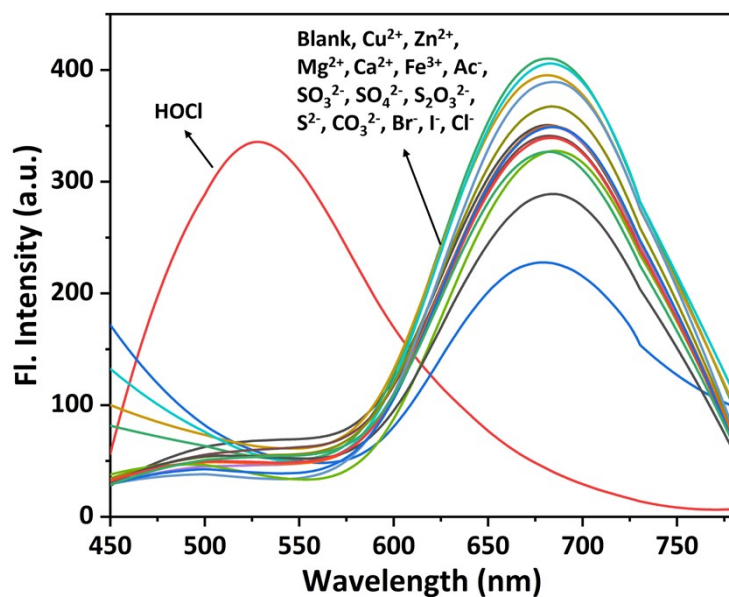

**Figure S20.** Fluorescence spectra of HBTN (10  $\mu\text{M}$ ) in the presence of HOCl (20  $\mu\text{M}$ ), metal ion (200  $\mu\text{M}$ ) or acid anion (200  $\mu\text{M}$ ).

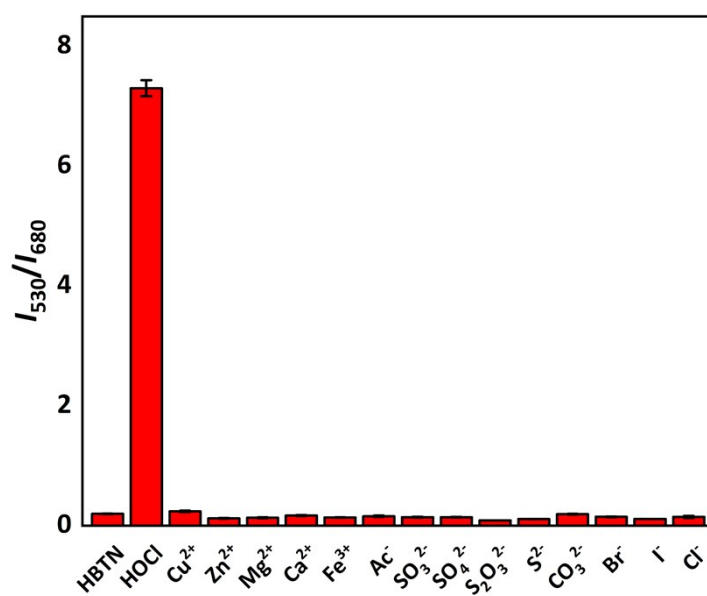

**Figure S21.** Ratio of fluorescence intensities ( $I_{530}/I_{680}$ ) of HBTN (10  $\mu\text{M}$ ) in the presence of HOCl (20  $\mu\text{M}$ ), metal ion (200  $\mu\text{M}$ ) or acid anion (200  $\mu\text{M}$ ).

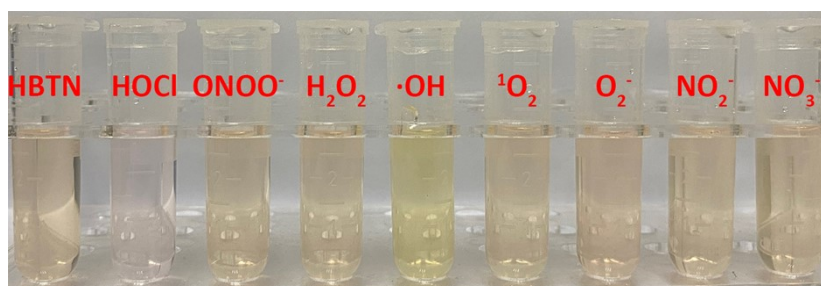

**Figure S22.** Photograph under visible light of HBTN (10  $\mu\text{M}$ ) in the presence of HOCl (20  $\mu\text{M}$ )



or other ROS (200  $\mu$ M).

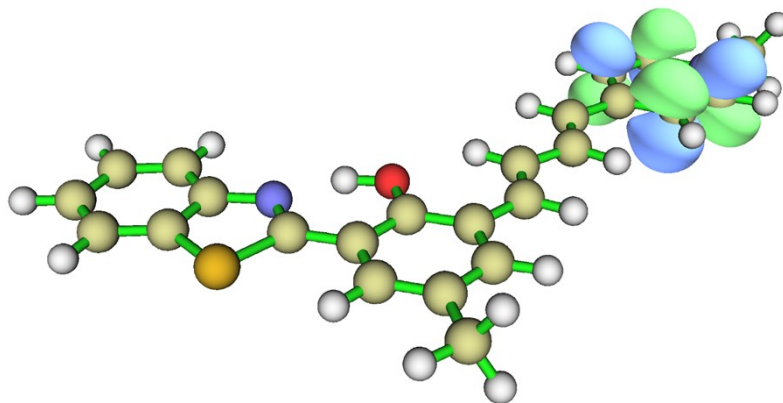

**Figure S23.** LUMO+1 of HBTN.

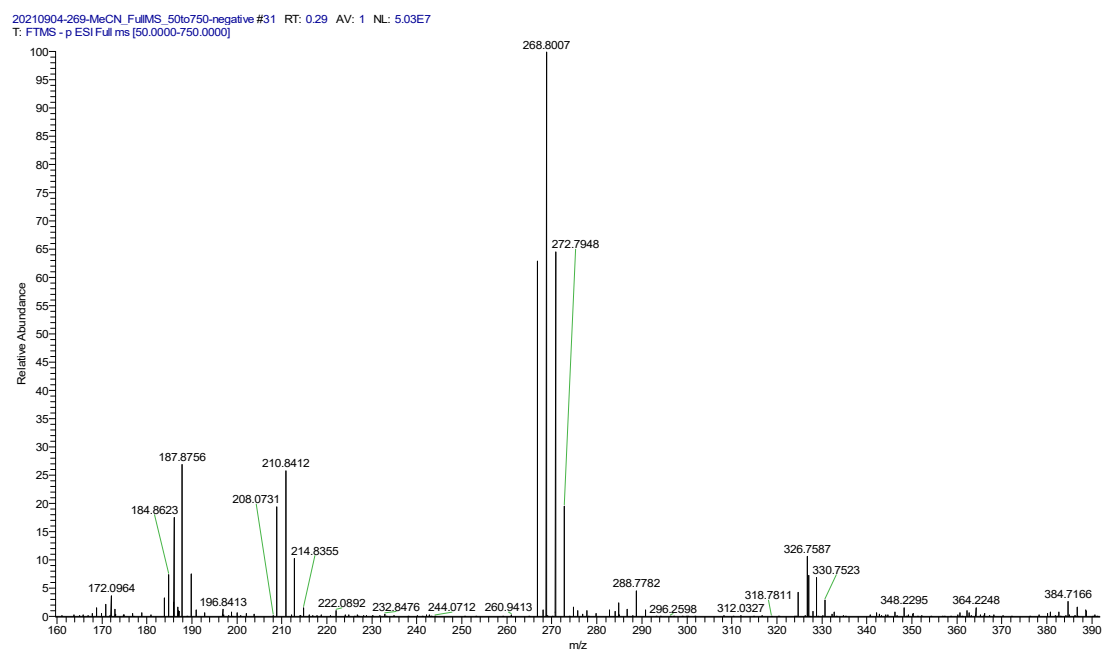

**Figure S24.** HRMS spectra of HBTN in the presence of HOCl.

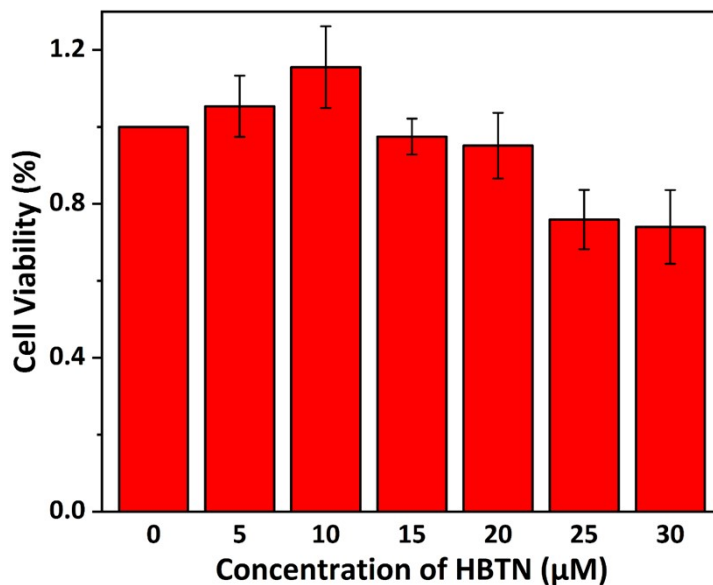

**Figure S25.** Cell viability of MCF-7 cells treated with different concentrations of HBTN (0, 5, 10, 15, 20, 25 and 30 μM) for 12 h, The cell viability was observed via MTT assay.

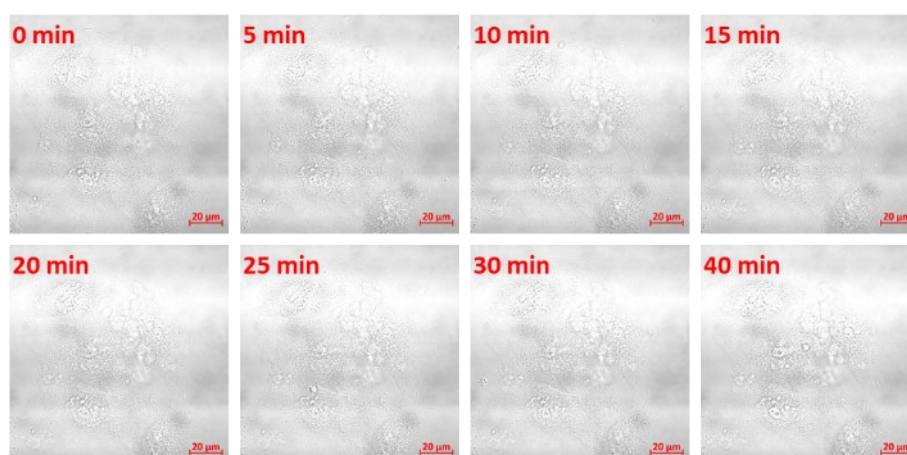

**Figure S26.** Brightfield images of MCF-7 cells irradiated with 405 nm laser light for different durations.

**Table S1.** The photophysical properties of HBTN, HBTN + glycerol and HBTN + HOCl.

| Samples                | $\lambda_{\text{max abs}}(\text{nm})$ | $\epsilon(\text{M}^{-1}\cdot\text{cm}^{-1})$ | $\lambda_{\text{max em}}(\text{nm})$ | $\Delta\lambda(\text{nm})$ | $\Phi_{\text{F}}$ | $B(\text{M}^{-1}\cdot\text{cm}^{-1})$ | $\tau(\text{ns})$ |
|------------------------|---------------------------------------|----------------------------------------------|--------------------------------------|----------------------------|-------------------|---------------------------------------|-------------------|
| HBTN                   | 402                                   | 22525                                        | 680                                  | 278                        | 0.0460            | 1036                                  | 5.465             |
| HBTN + glycerol (100%) | 419                                   | 24400                                        | 680                                  | 261                        | 0.1943            | 4741                                  | 8.839             |

|             |     |       |     |     |        |     |       |
|-------------|-----|-------|-----|-----|--------|-----|-------|
| HBTN + HOCl | 288 | 14915 | 530 | 242 | 0.0324 | 483 | 4.421 |
|-------------|-----|-------|-----|-----|--------|-----|-------|

$\lambda_{\text{max abs}}$ : Maximum absorbance wavelength.  $\epsilon$ : Molar extinction coefficient.  $\lambda_{\text{max em}}$ : Maximum emission wavelength.  $\Delta\lambda$ : Stokes shift.  $\Phi_{\text{F}}$ : Fluorescence quantum yield.  $B$ : Brightness. The brightness was calculated using  $B = \epsilon \times \Phi_{\text{F}}$ .  $\tau$ : Fluorescence lifetime. Fluorescence quantum yield and fluorescence lifetime were tested by Edinburgh FLS980 steady-state transient fluorescence spectrometer.

**Table S2.** Comparison of fluorescent probe for viscosity and HOCl.

| Probes             | Emission peak        | Stokes shift | Subcellular localization | Bioimaging                 | Reference                                                   |
|--------------------|----------------------|--------------|--------------------------|----------------------------|-------------------------------------------------------------|
| HBTN               | 680 nm/530 nm        | 278 nm       | Mitochondrial targeting  | MCF-7 cells and zebrafish  | This work                                                   |
| Lyso-VH            | 580 nm/500 nm        | 144 nm       | Lysosomal targeting      | A549 cells and mouse       | <i>Anal. Chem.</i> , 2022, <b>94</b> , 12144-12151          |
| TPP-AN             | 414 nm/600 nm        | 230 nm       | Mitochondrial targeting  | HeLa cells                 | <i>Talanta</i> , 2022, <b>241</b> , 123235                  |
| CBRV               | 571 nm/710 nm        | 225 nm       | No                       | HeLa cells                 | <i>Spectrochim. Acta Part A</i> , 2021, <b>246</b> , 119059 |
| PTZ-TPP/<br>PTZ-MP | 610 nm/580 nm/500 nm | 125 nm       | No                       | INS-1 $\beta$ -islet cells | <i>J. Mol. Struct.</i> , 2021, <b>1227</b> , 129523         |
| BDP-CY             | 600 nm/510 nm        | 48 nm        | No                       | MCF-7 cells                | <i>Dyes Pigments</i> , 2016, <b>125</b> , 89-94             |
